# Supplementary material
Source: Royal Society of Chemistry journal article supplement (doi:10.1039/d6dt01002d)

**Supplementary Information for**  
**The Design of Earth Abundant Metal Catalysts for Nitrous Oxide-Based Oxidations.**  
**Part I. N<sub>2</sub>O Coordination and Oxygen-Transfer to Metal**

Kenneth M. Nicholas

*Table of Contents for non-XYZ files\**

|                                                                                                                        |       |
|------------------------------------------------------------------------------------------------------------------------|-------|
| Experimental Procedure for Fe(Salen) Reaction with N <sub>2</sub> O                                                    | S 2   |
| UV-Vis spectrum of putative (Salen) <sub>2</sub> Fe <sub>2</sub> (N <sub>2</sub> O)                                    | S3    |
| ESI-Mass spectrum(+) of putative (Salen) <sub>2</sub> Fe <sub>2</sub> (N <sub>2</sub> O)                               | S4    |
| Simulated ESI-MS of (Salen) <sub>2</sub> Fe <sub>2</sub> (N <sub>2</sub> O)H <sup>+</sup>                              | S5    |
| Calculated Free Energies for Structures Derived from Complexants <b>1 – 15</b><br>and N <sub>2</sub> O-derived species | S 6-9 |

The X,Y,Z coordinates for all computed structures are in a separate Mercury-readable SI file named: KN LM-N2O\_XYZ.xyz

### **Preparation of *N,N'*-bis(salicylideneamino)ethanato)iron (II) [(Salen)Fe].**

(Salen)Fe was prepared by the reaction of the *N,N'*-bis(salicylideneamino)ethane and iron(II) acetate in refluxing methanol under nitrogen by a literature method. (Earnshaw, A.; King, E. A.; Larkworthy, L. F. *J. Chem. Soc. A: Inorganic, Physical, Theoretical* **1968**, 5, 1048-52).

### **Experimental Procedure for Fe(Salen) Reaction with N<sub>2</sub>O**

Approximately 50 mg of dark red brown Fe(Salen) was transferred under nitrogen in an inert atmosphere box into a 150 mL Fisher-Porter thick-walled glass vessel fitted with a stir bar and then capped with a rubber septum. After transferring the vessel out of the box, 5 mL of dry N<sub>2</sub>-saturated methylene chloride was injected through the septum with N<sub>2</sub> purging. The septum was replaced quickly with a N<sub>2</sub>O-purging reactor head which was then attached to the glass reactor. Several cycles of N<sub>2</sub>O pressurization/venting cycles were carried out as the reactor pressure was raised gradually to 90 psig with magnetic stirring; after a few hours an orange-rust colored solid gradually formed. After stirring at rt for 48 hr the N<sub>2</sub>O was vented and the orange solid was allowed to settle. Under a N<sub>2</sub>-purge the red supernatant solution was drawn off by syringe, and the orange solid (approx. 25 mg) was dried under an N<sub>2</sub> flow for characterization and storage. UV-Vis (CH<sub>2</sub>Cl<sub>2</sub>, λ) 250 nm, 314 nm, 386 nm; ESI-MS (MeOH or CH<sub>2</sub>Cl<sub>2</sub>), M/e 322.0405 [C<sub>16</sub>H<sub>14</sub>N<sub>2</sub>O<sub>2</sub>Fe<sup>+</sup>=(Salen)Fe<sup>+</sup>], 675.0985 [C<sub>32</sub>H<sub>29</sub>N<sub>5</sub>O<sub>5</sub>Fe<sub>2</sub><sup>+</sup>= (Salen)<sub>2</sub>Fe<sub>2</sub>(NO)H<sup>+</sup>], 689.0782 [C<sub>32</sub>H<sub>29</sub>N<sub>6</sub>O<sub>5</sub>Fe<sub>2</sub><sup>+</sup>=(Salen)<sub>2</sub>Fe<sub>2</sub>(N<sub>2</sub>O)H<sup>+</sup>]; each of these ions appeared as a cluster of peaks with the appropriate iron isotopic signature, <sup>54</sup>Fe (6%), <sup>56</sup>Fe (92%), <sup>57</sup>Fe (2%). Initial efforts to grow X-ray quality crystals of this product were unsuccessful. UV-Vis and ESI-MS (experimental and simulated) spectra are on following pages.

A control experiment in which an Fe(Salen) solution in methylene chloride was stirred in air did not show a similar color change nor formation of a precipitate.

UV-Vis spectrum: Fe(Salen) + N<sub>2</sub>O rxn and soln in CH<sub>2</sub>Cl<sub>2</sub>

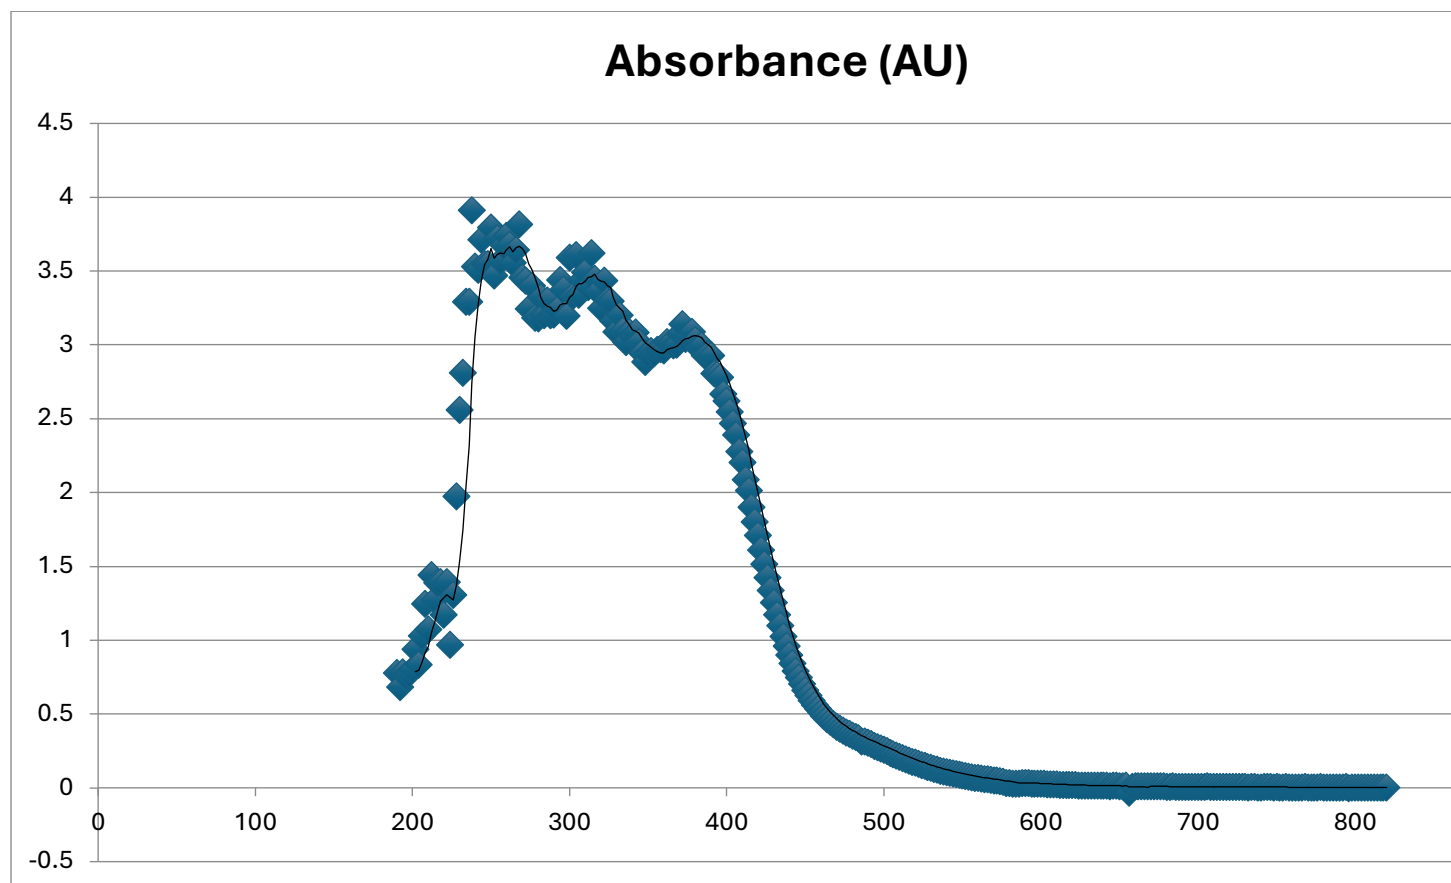

# Spectrum Plot Report

|                |                 |                    |                   |                    |
|----------------|-----------------|--------------------|-------------------|--------------------|
| Name           | KN-7-10         | Rack Pos.          | Instrument        | Operator           |
| Inj. Vol. (µl) | 5               | Plate Pos.         | IRM Status        |                    |
| Data File      | 13372KMN-0006.d | Method (Acq)       | Comment           |                    |
|                |                 | Pos-Loop-SF-6546.m |                   |                    |
|                |                 |                    | G6546A QTOF       |                    |
|                |                 |                    | Success           |                    |
|                |                 |                    | 0.01X             |                    |
|                |                 |                    | Acq. Time (Local) |                    |
|                |                 |                    |                   | 7/10/2024 10:24:17 |
|                |                 |                    |                   | AM (UTC-07:00)     |

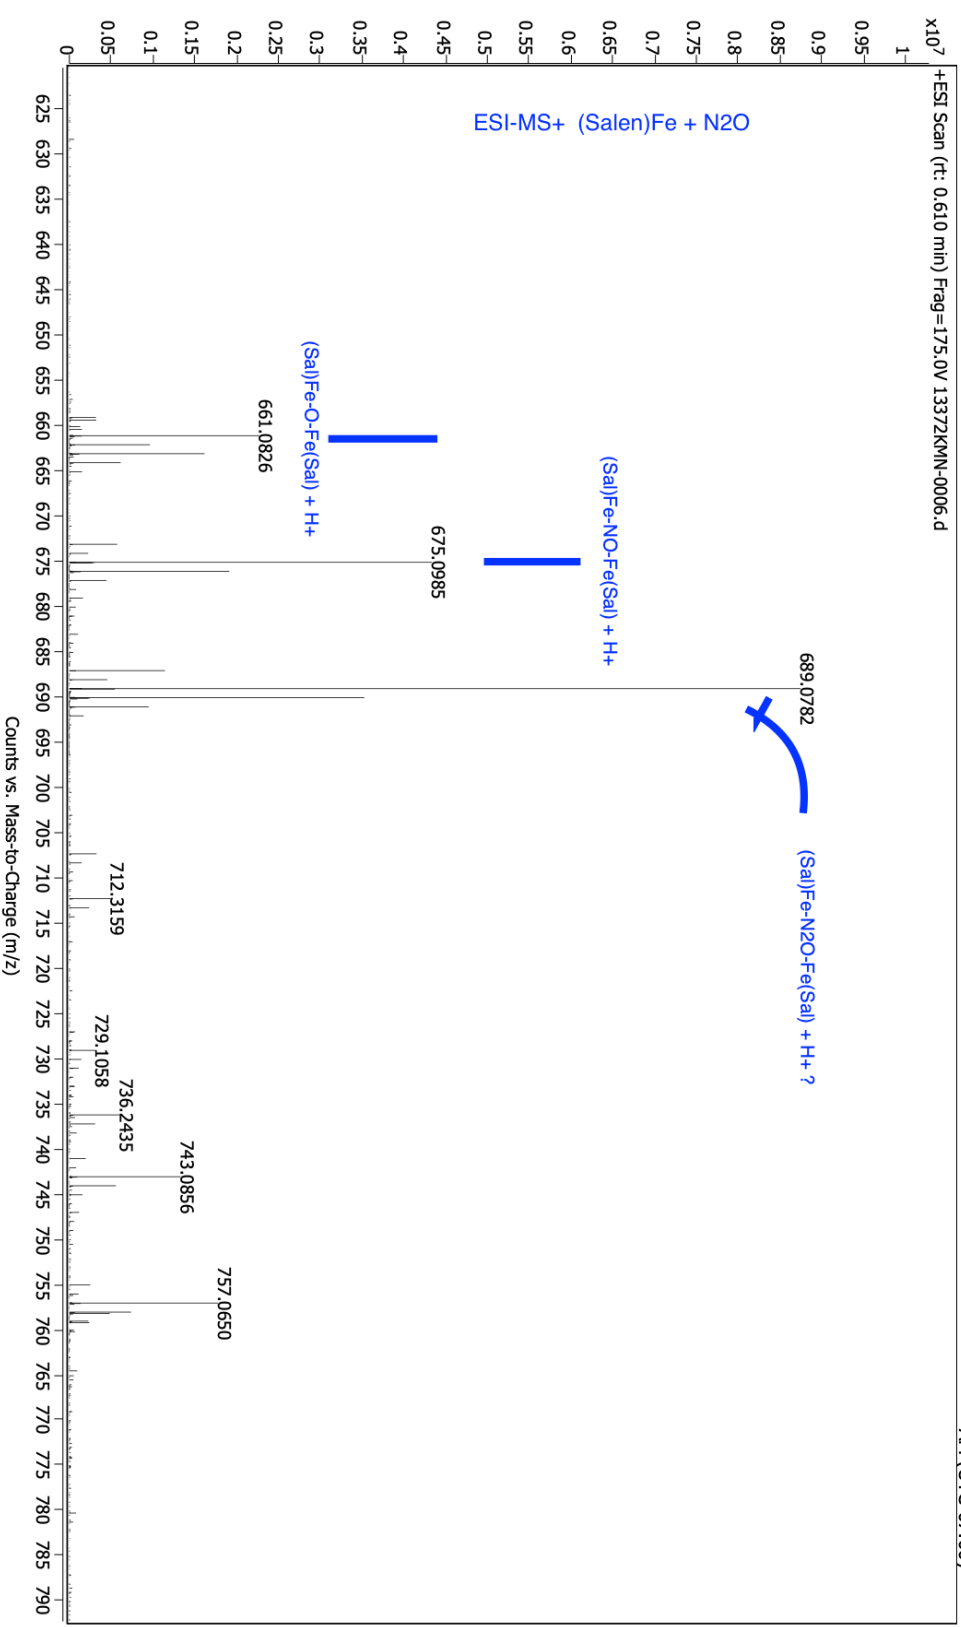

Simulated MS for (Salen)<sub>2</sub>Fe<sub>2</sub>(N<sub>2</sub>O)H<sup>+</sup>

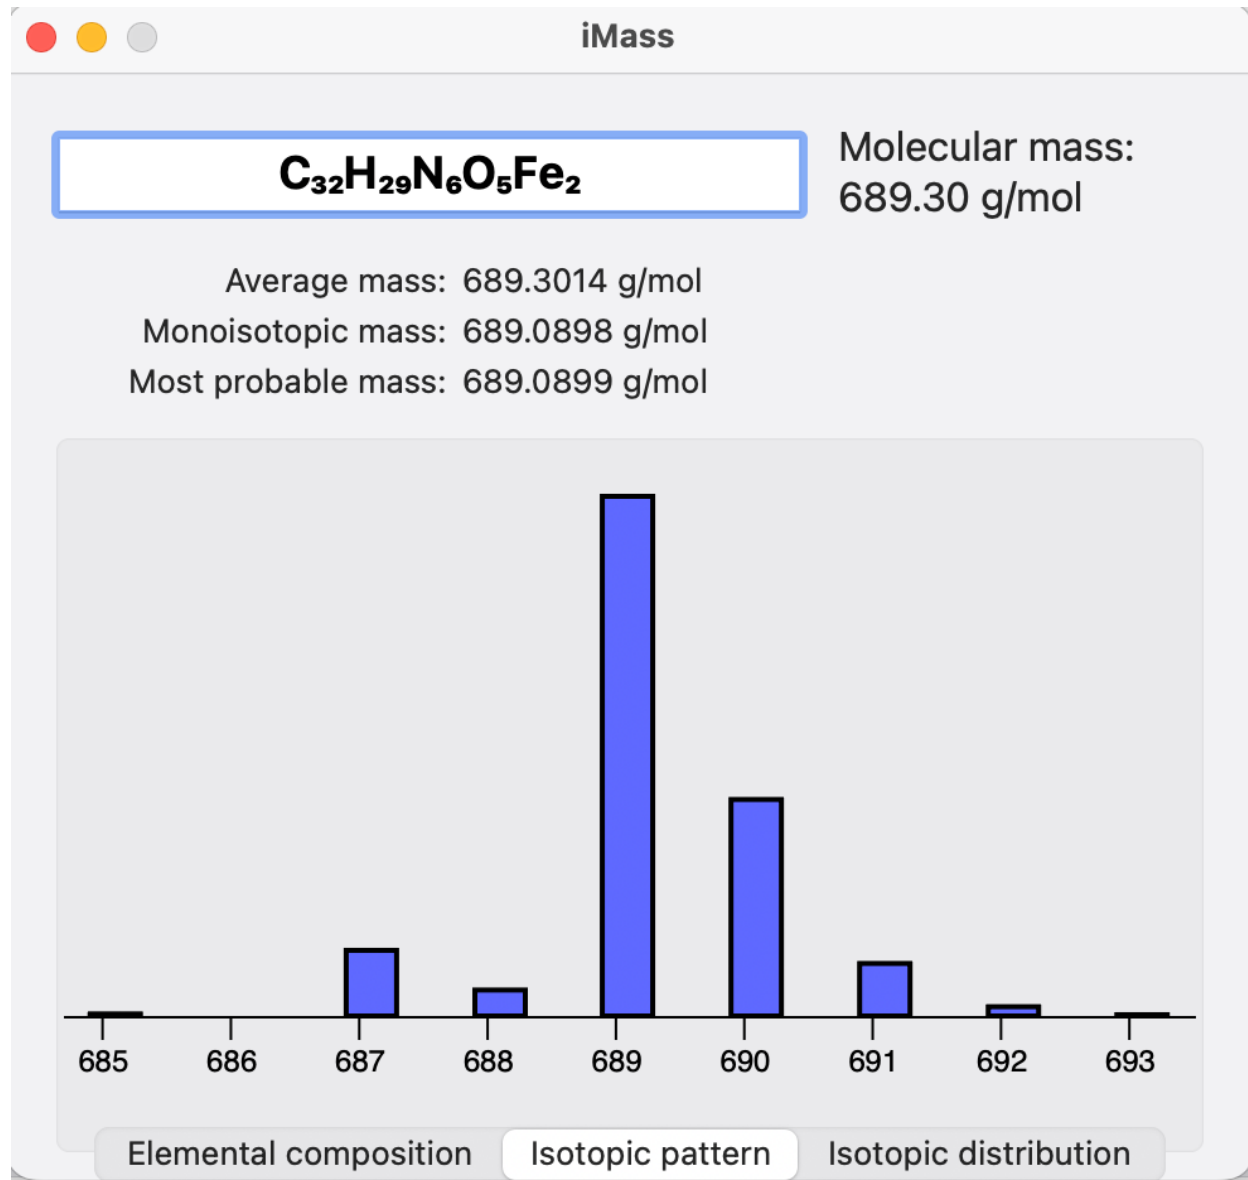

Supplement: d6dt01002d1.pdf [file d6dt01002d1.pdf]
